# Supplementary material
Source: publisher figshare collection journal article supplement (https://gsapubs.figshare.com/ndownloader/files/22398375)
Supplement: Supplementary file 1 [file 22398375]

Table A1 40Ar/39Ar data from Potassium Feldspar, (F): furnace run, (L): laser run

| Sample # and  rock type | Lat (°N)  Lon. (°W) | Elev.  (m) | 40Ar/39Ar ave. min. age (Ma) ± 1σ | # steps in ave. | Isochron min. age (Ma) ± 1σ | 40Ar/36/Ari | MSWD | # isoc.  steps |
| --- | --- | --- | --- | --- | --- | --- | --- | --- |
| **North of Denali Fault** | | | | | | | | |
| 01PAN (L)  granite | 63.4670  148.7350 | 1011 | 30.8 ± 6.9 | 6 | 30 ± 3.8 | 283.3 ± 91.9 | 0.06 | 3 |
| 332AST (L)  granite | 63.4810  148.4880 | 1324 | 28.4 ± 0 .9 | 2 | 29.8 ± 0.4 | 297.3 ± 0.4 | 2.25 | 13 |
| DT45 (F) granodiorite | 63.5800  147.6460 | 1920 | 12.8 ± 0.4 | 2 | 12.5 ± 0.4 | 313.1 ± 3.4 | 1.08 | 6 |
| 37NEN (F)  granodiorite | 63.5440  147.6970 | 2347 | 11.5 ± 0.2 | 3 | 10.7 ± 2.1 | 306.8 ± 27.6 | 0.16 | 3 |
| 32NEN (F) granodiorite | 63.5130  147.7270 | 1271 | 7.4 ± 0.1 | 3 | 6.5 ± 0.3 | 317.7 ± 3.8 | 1.07 | 5 |
| 02DEB (F)  tonalite | 63.6126  147.2770 | 2268 | 14.6 ± 0.3 | 5 | 14.8 ± 0.8 | 291.6 ± 10.2 | 0.47 | 6 |
| 24DEB (F)  tonalite | 63.5957  147.3449 | 2042 | 10.3 ± 1.1 | 4 | 10.9 ± 1.7 | 294.0 ± 5.7 | 2.25 | 4 |
| 22DEB (F)  granitoid | 63.5391  147.3237 | 1341 | 6.8 ± 0.1 | 3 | 6.0 ± 0.2 | 327.2 ± 3.5 | 1.33 | 6 |
| 03BAL (F)  granite | 63.6224  146.9251 | 2164 | 12.5 ± 0.3 | 3 | 12.8 ± 0.4 | 319.0 ± 7.7 | 0.95 | 4 |
| 26BAL (F)  granite | 63.6139  146.8696 | 2846 | 10.1 ± 0.9 | 5 | 9.7 ± 1.8 | 295.9 ± 11.2 | 1.34 | 5 |
| 18BAL (F)  granite | 63.5808  146.9405 | 1750 | 8.4 ± 0.2 | 2 | 8.5 ± 0.4 | 296.2 ± 5.0 | 1.66 | 3 |
| 03RAP (F)  granite | 63.4827  146.0428 | 2041 | 18.5 ± 0 .1 | 2 | 18.6 ± 0.5 | 294.4 ± 21.1 | 0 | 2 |
| **South of Denali Fault** | | | | | | | | |
| 45RAP (L) orthogneiss | 63.4723  146.4310 | 1635 | 28.6 ± 0.4 | 7 | 28.6 ± 0.4 | 349.3 ± 93.5 | 0.93 | 7 |
| 311AST (F)  orthogneiss | 63.4881  146.8292 | 1905 | 30.0 ± 1.4 | 5 | 29.9 ± 4.7 | 292.7 ± 10.3 | 0.31 | 4 |
| 05RAP (L) orthogneiss | 63.4337  146.5411 | 2111 | 28.6 ± 0.3 | 7 | 28.7± 0.2 | 282.7 ± 12.0 | 0.57 | 7 |
| 09RAP (L) orthogneiss | 63.4345  146.5277 | 1918 | 29.2 ± 0.3 | 9 | 28.8 ± 0.2 | 319.0± 2.6 | 0.87 | 11 |
| 16RAP (L)  orthogneiss | 63.4635  146.5028 | 1748 | 28.3 ± 0.2 | 10 | 28.2 ± 0.2 | 315.2 ± 2.9 | 1.15 | 12 |
| 23RAP (L)  orthogneiss | 63.4492  146.4516 | 2458 | 29.5 ± 0.2 | 7 | 29.3 ± 0.2 | 354.0 ± 2.9 | 0.44 | 10 |
